# Supplementary material
Source: publisher site journal article supplement (https://www.dovepress.com/article/493749)
Supplement: Supplementary file 1 [file get_supplementary_file.php]

**Supplementary information**

**
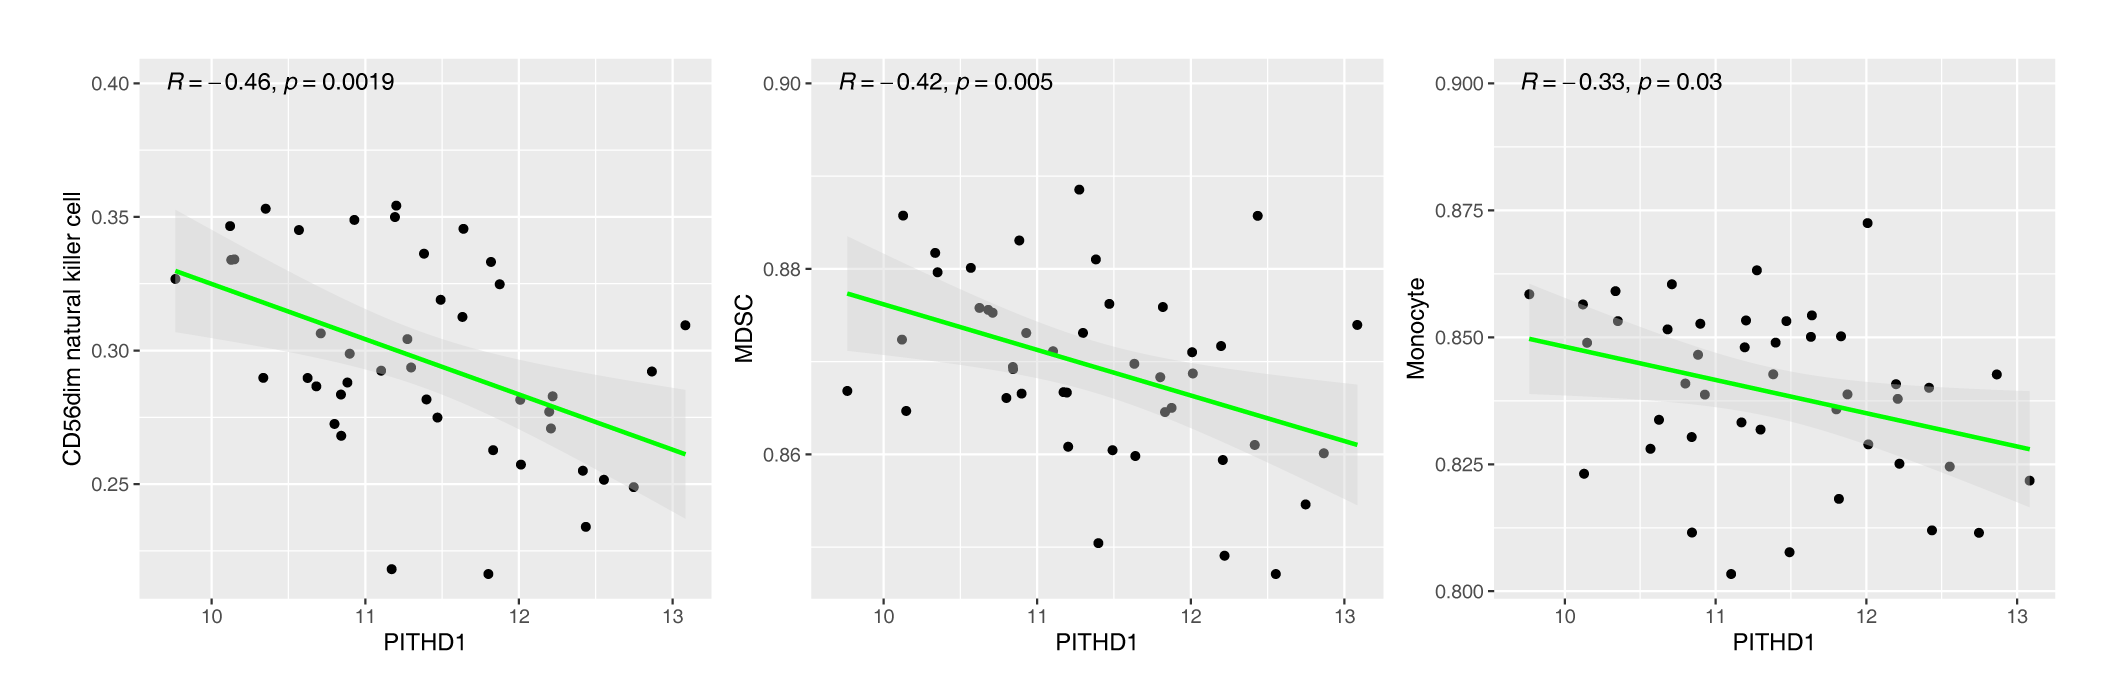
**

**Supplementary Figure 1.** Correlation analysis of PITHD1 with three types of immune cells.

**
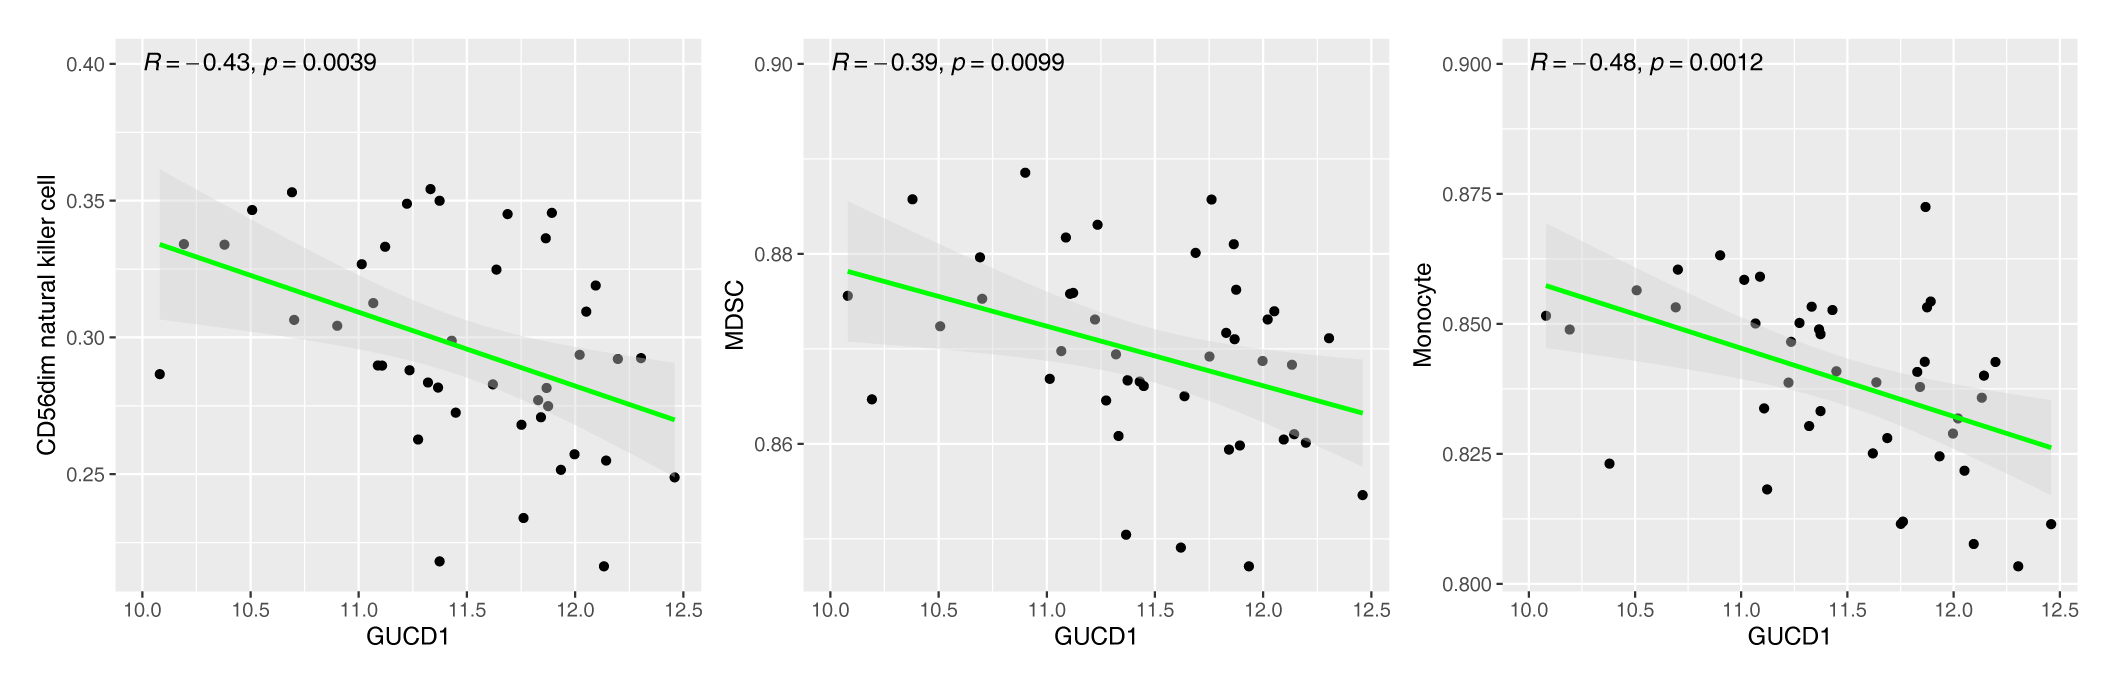
**

**Supplementary Figure 2.** Correlation analysis of GUCD1 with three types of immune cells.

**
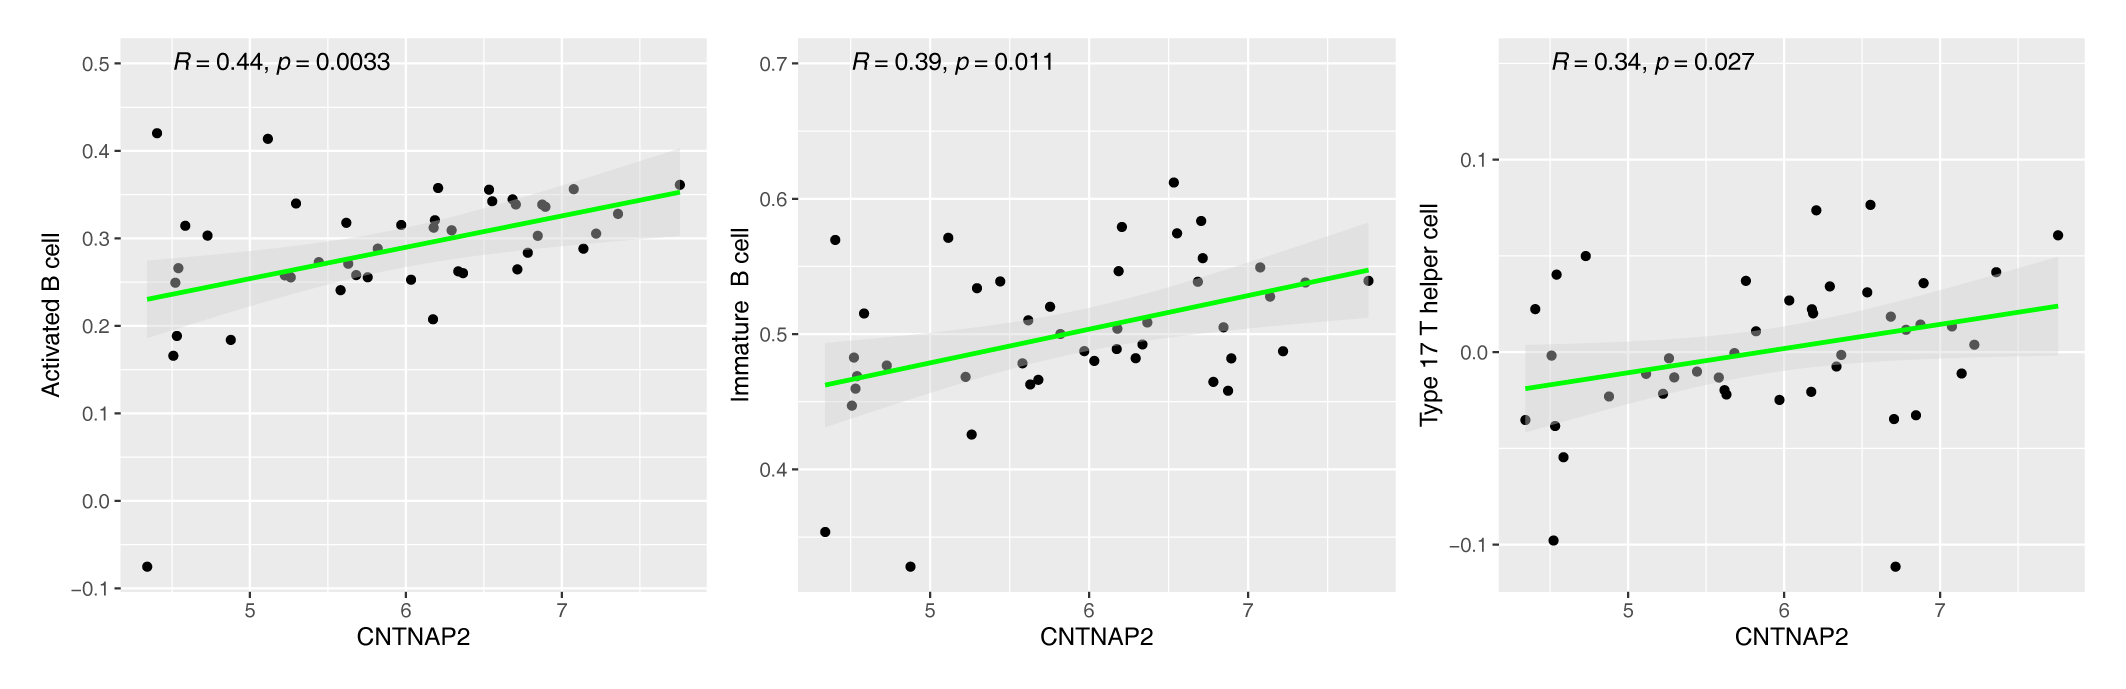
**

**Supplementary Figure 3.** Correlation analysis of CNTNAP2 with three types of immune cells.

**
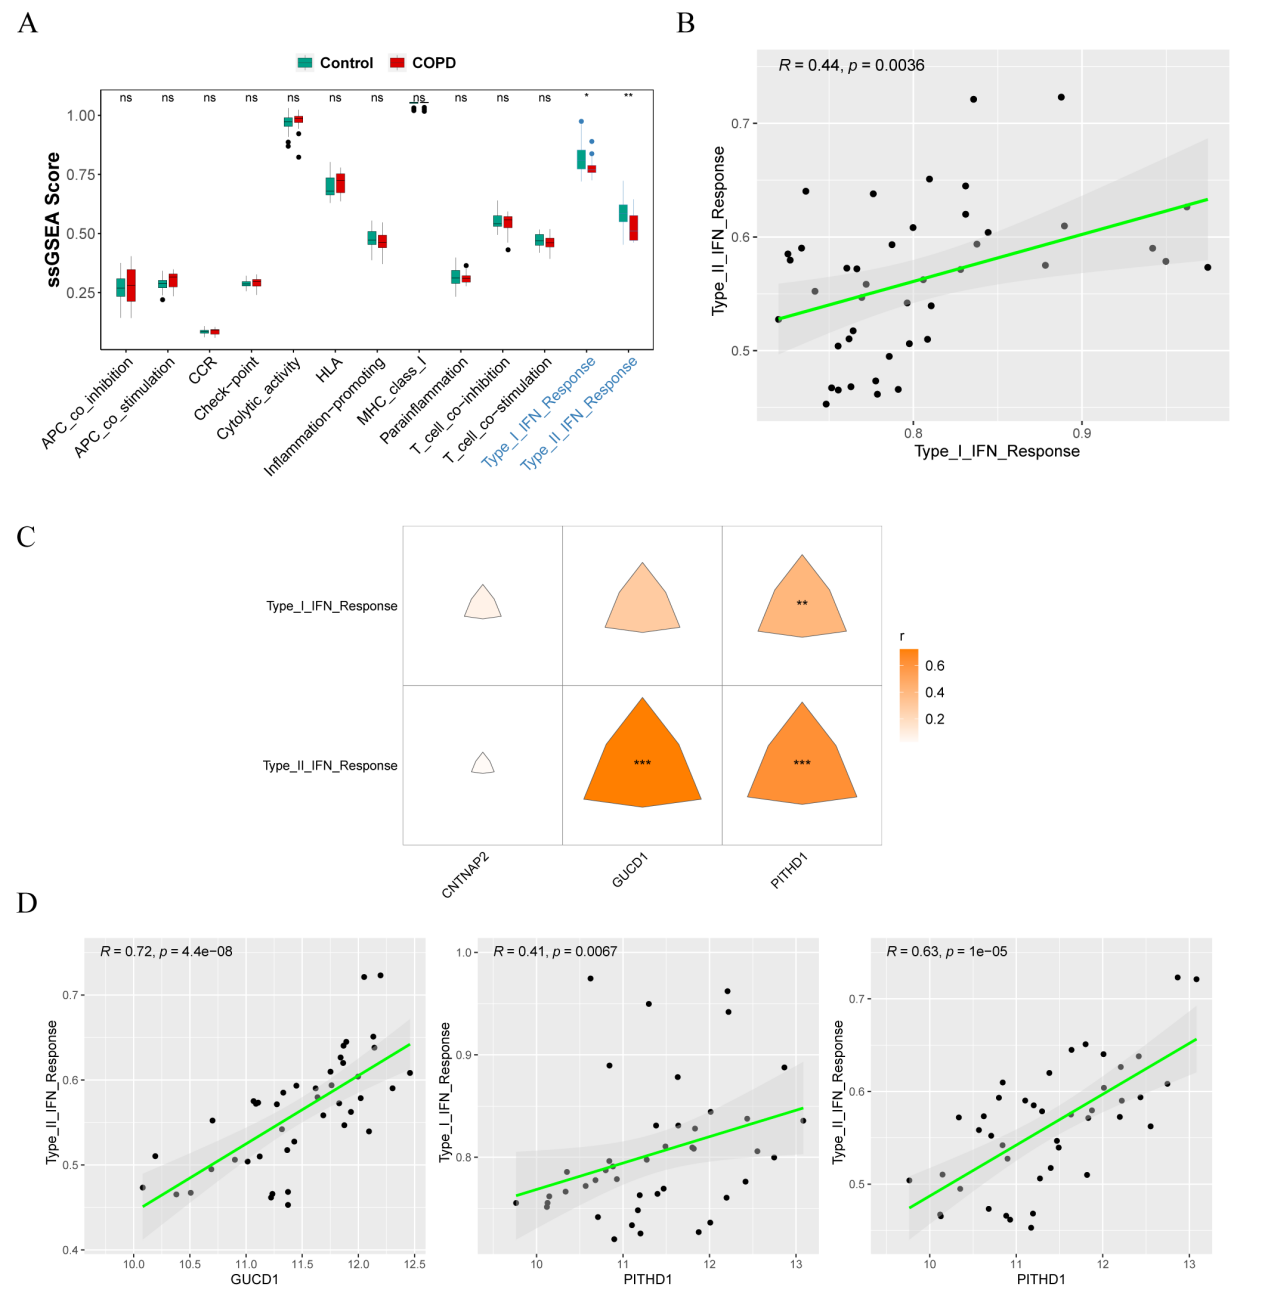
**

**Supplementary Figure 4** Immune correlation analysis. (A) Differential analysis of different immune-related functions in control and COPD groups. (B) Spearman analysis of two immune-related functional correlations. (C-D) Correlation analysis of two immune-related functions and three biomarkers. * indicates p<0.05; ** indicates p<0.01.

**
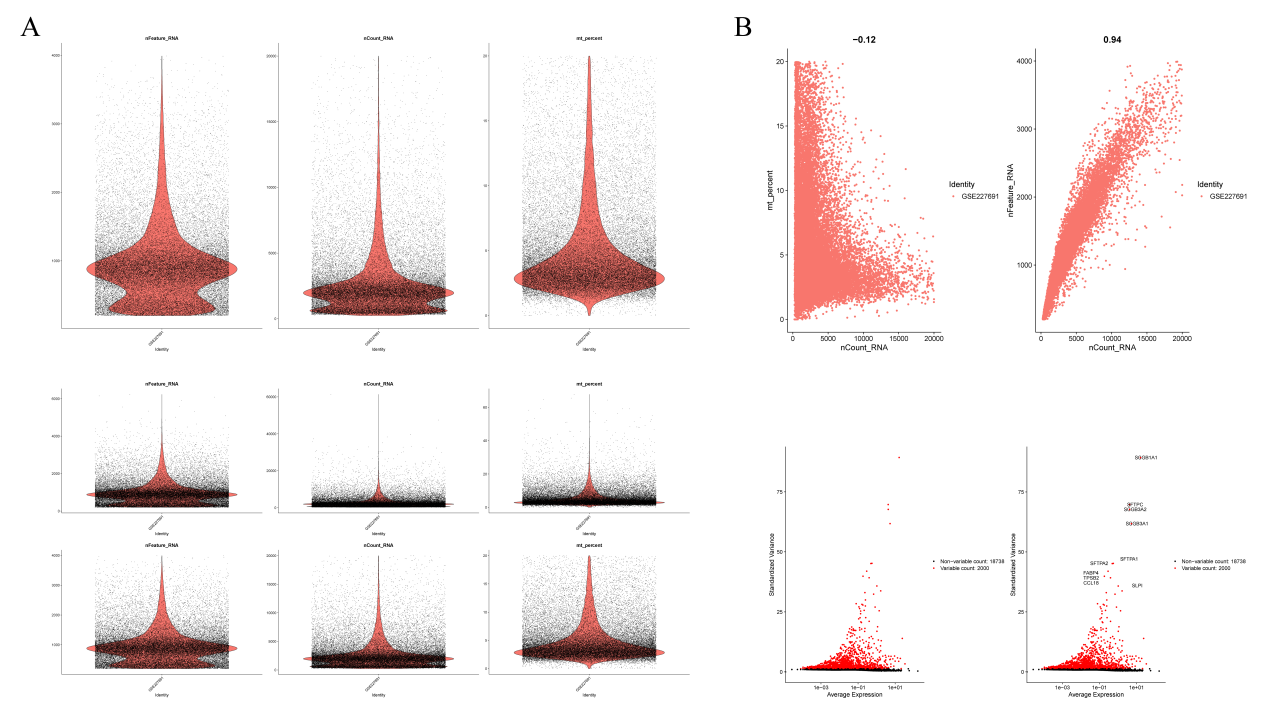
**

**Supplementary Figure 5** (A) Quality control chart for single cell analysis. (B) Screening map for highly variable genes.

**
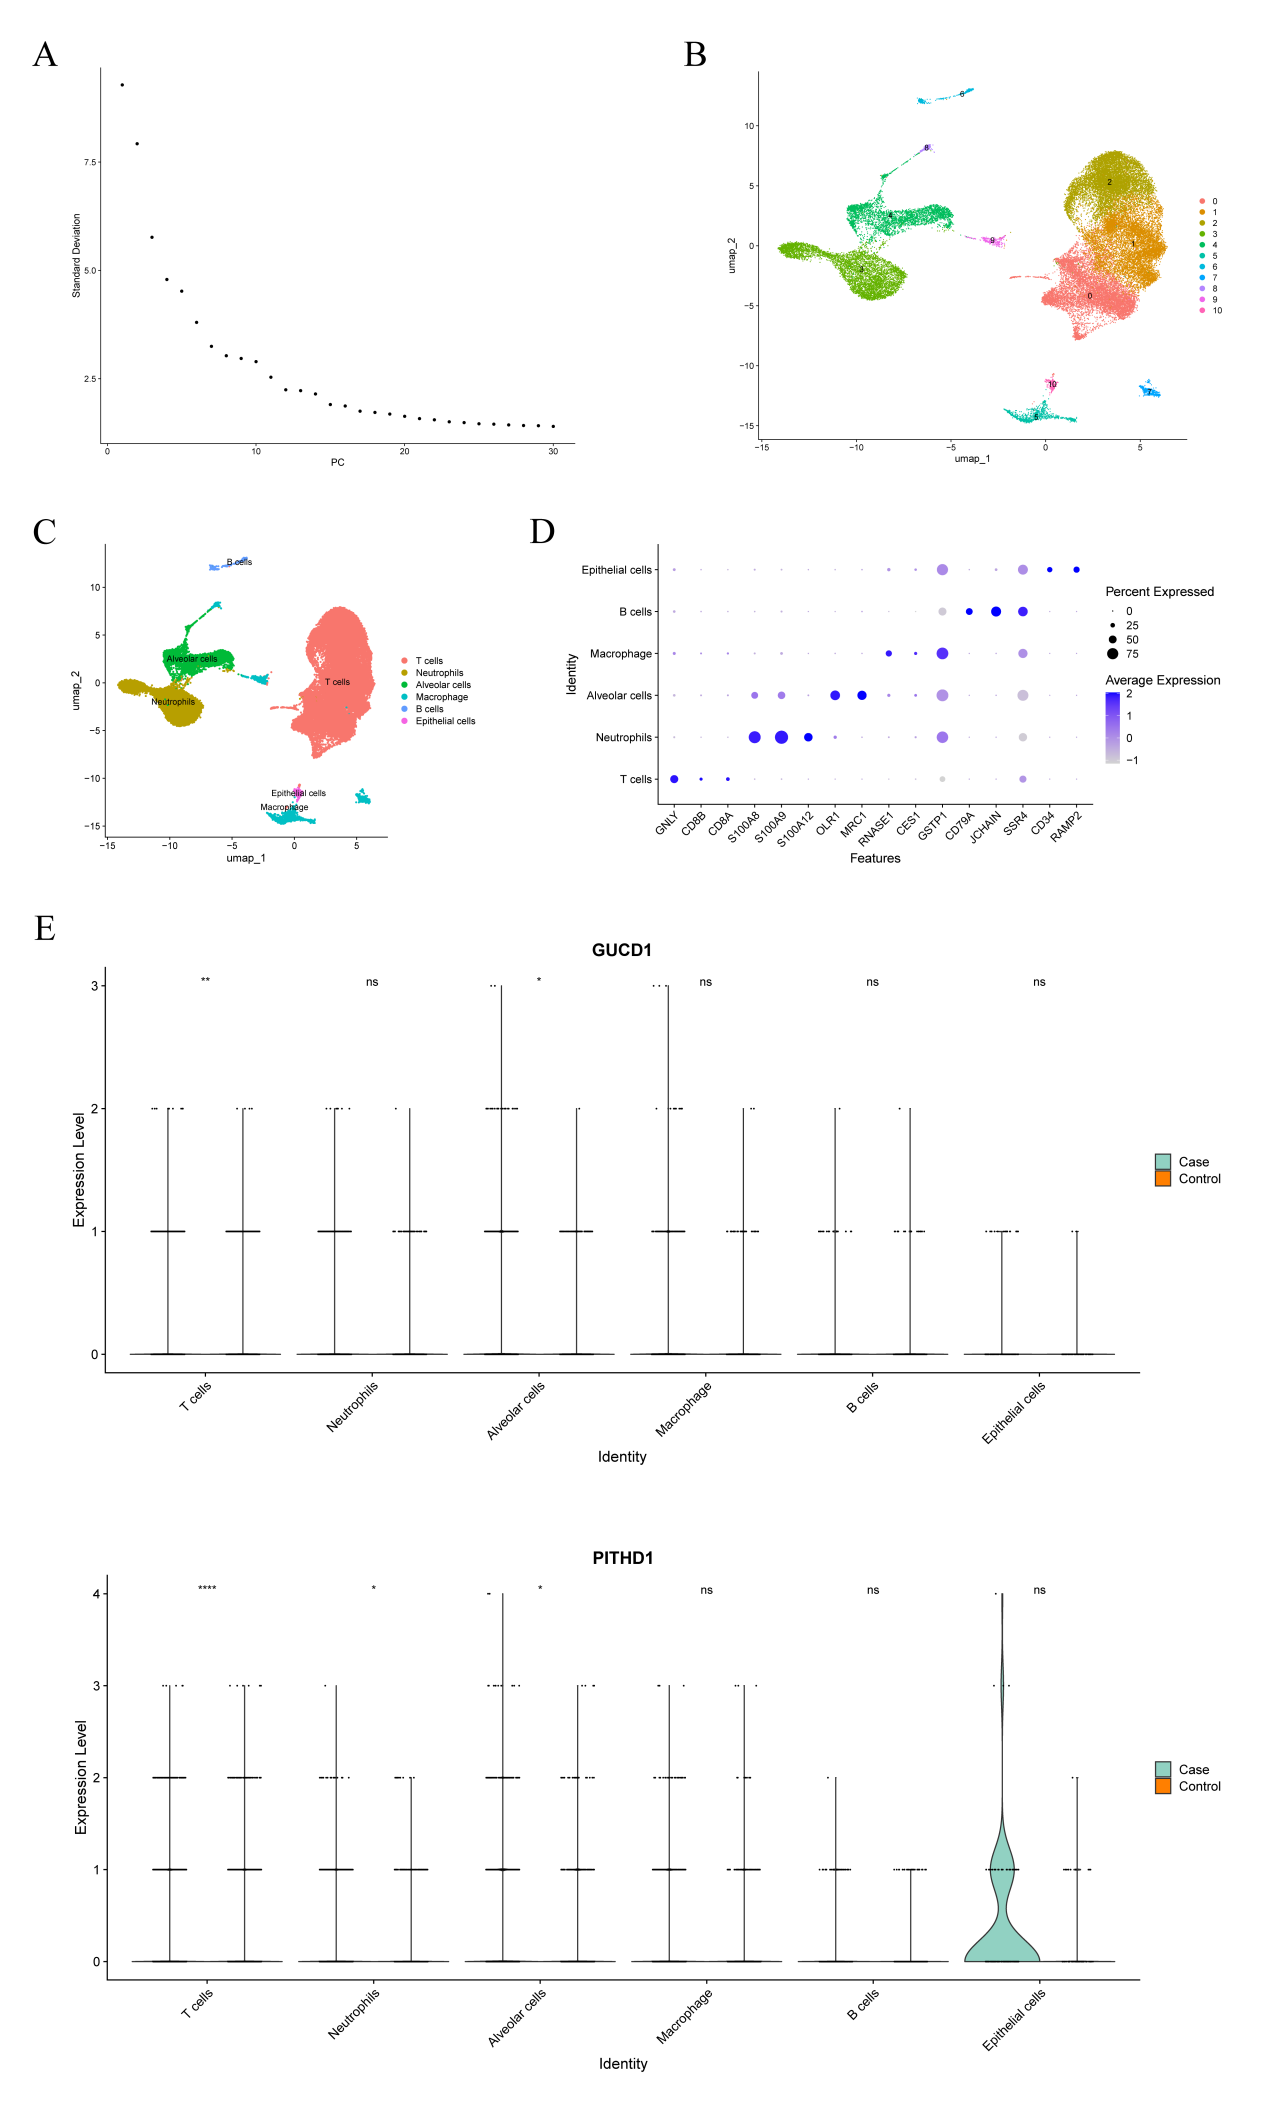
**

**Supplementary Figure 6** Single-cell analysis. (A) Fragmentation map of PCA distribution. (B) UMAP cell clustering diagram. (C) UMAP cell annotation diagram. (D) Bubble diagram of cellular annotation of marker genes. (E) Violin plots of biomarkers expression. * indicates p<0.05; ** indicates p<0.01.

**
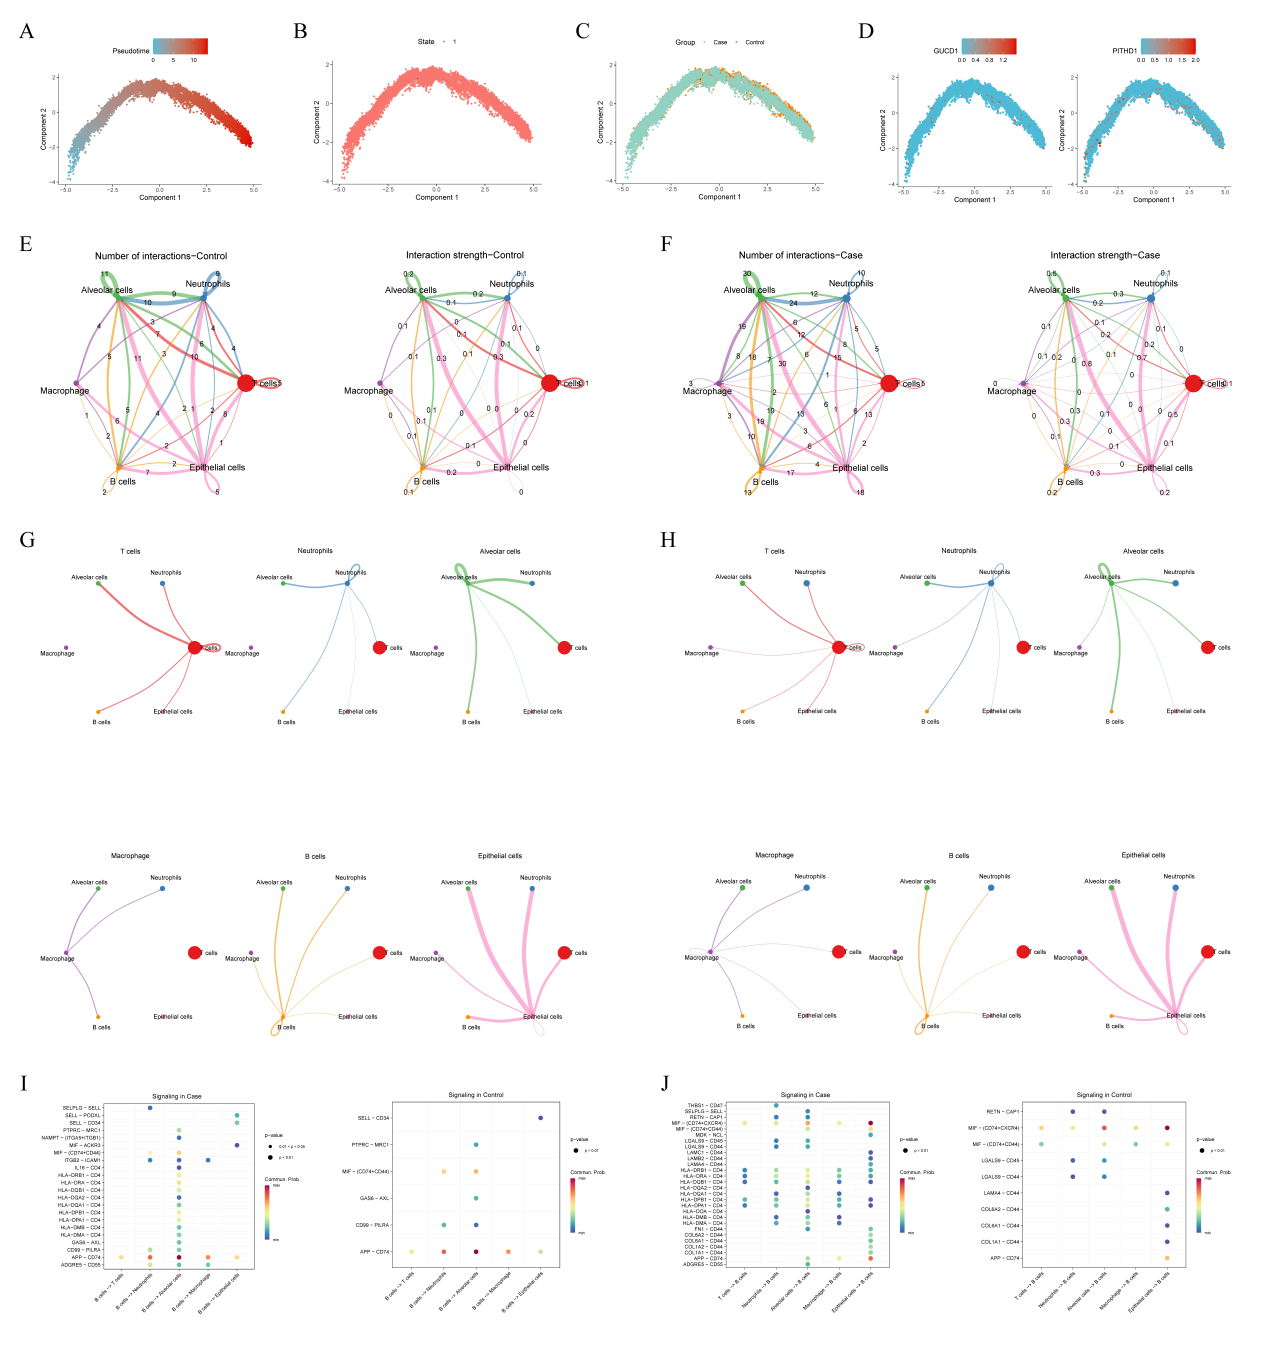
**

**Supplementary Figure 7** Analysis of key cells and biomarkers. (A-C) Diagram of trajectories of T-cell differentiation. State plot of T-cells. Diagram of the trajectories of T cell differentiation in case and control groups. (D) Expression map of biomarker differentiation trajectories. (E-H) Plot of the number and strength of annotated cell-to-cell interactions in case and control. (I-J) Bubble diagram of cell-to-cell interactions subject to ligands

**
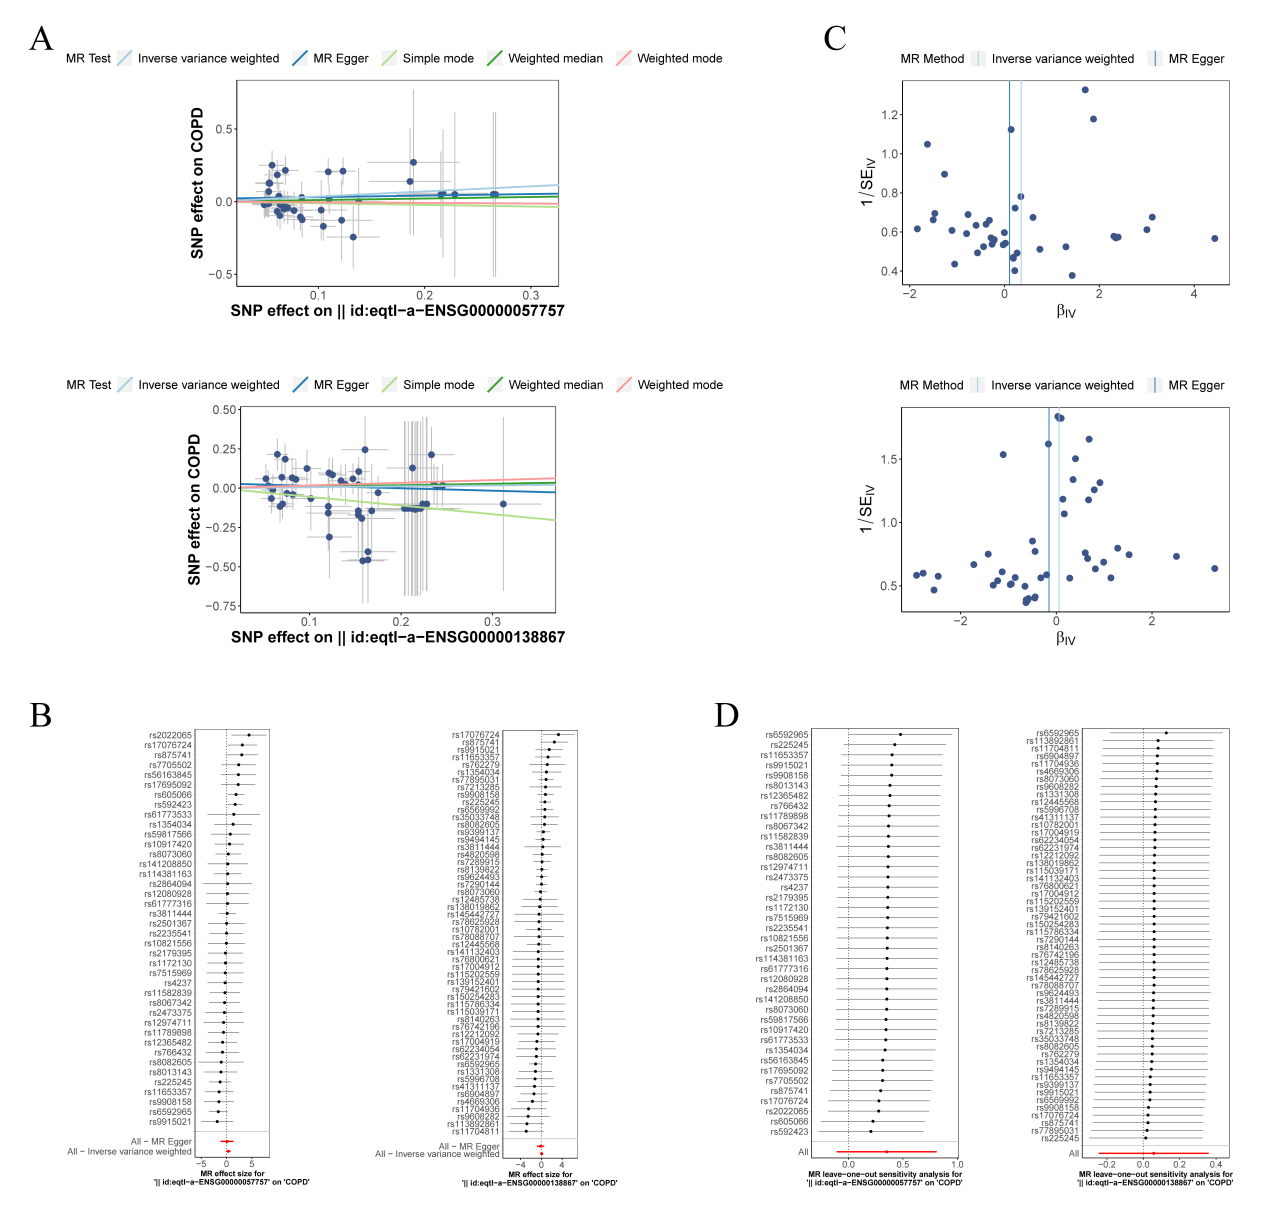
**

**Supplementary Figure 8** (A-C) Scatter plot, forest plot, funnel plot for MR analysis. (C) UMAP cell annotation diagram. (D) Forest map with leave-one-out analysis.


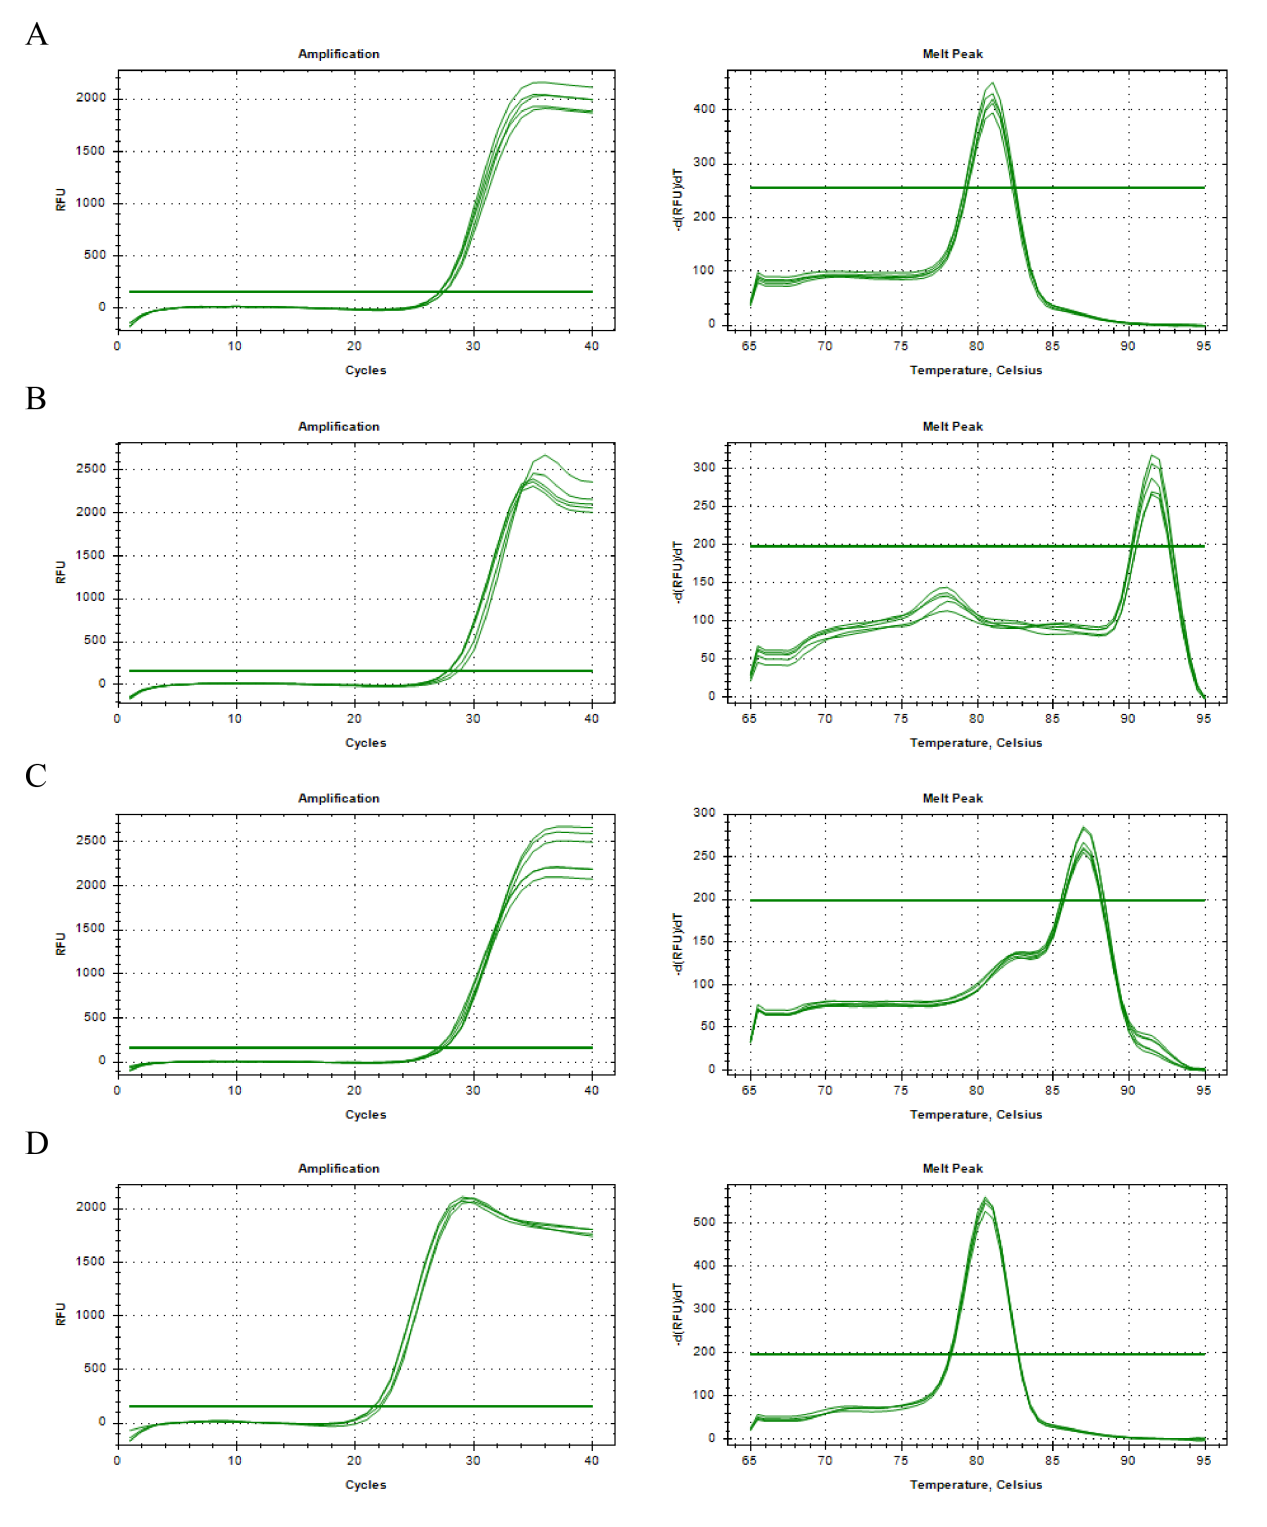


**Supplementary Figure 9** Melting curve analysis. (A) CNTNAP2. (B) GUCD1. (C) PITHD1. (D) GAPDH.

**Supplementary Table 1 Basic information about the patient.**

|  |  | Age | Gender | Height.(cm) | Weight(kg) | FEV1/FVC  (%) | FEV1  (L) | CAT | mMRC |
| --- | --- | --- | --- | --- | --- | --- | --- | --- | --- |
| COPD | 1 | 66 | Female | 158 | 60 | 68.92 | 1.87 | 6 | 0 |
| 2 | 79 | Male | 171 | 71.7 | 53.65 | 1.86 | 6 | 1 |
| 3 | 72 | Male | 165 | 63 | 45.45 | 1.42 | 16 | 1 |
| 4 | 63 | Male | 172 | 64 | 49.39 | 2.29 | 15 | 1 |
| 5 | 61 | Male | 160 | 67 | 58.03 | 2.13 | 15 | 2 |
| 6 | 56 | Female | 158 | 69 | 65 | 2 | 19 | 2 |
| 7 | 66 | Male | 170 | 61 | 41.59 | 1 | 3 | 1 |
| 8 | 67 | Male | 169 | 76 | 48.34 | 1.36 | 6 | 1 |
| Health | 1 | 60 | Male | 165 | 54 | 74.33 | 2.56 | - | - |
| 2 | 57 | Female | 163 | 60 | 89.15 | 2.45 | - | - |
| 3 | 68 | Male | 164 | 67 | 80.88 | 3.32 | - | - |
| 4 | 60 | Male | 178 | 59 | 84.11 | 3.74 | - | - |
| 5 | 60 | Male | 175 | 89 | 72.28 | 2.9 | - | - |
| 6 | 58 | Female | 163 | 65 | 78.6 | 3.25 | - | - |
| 7 | 71 | Male | 172 | 71 | 81.37 | 3.01 | - | - |
| 8 | 78 | Male | 169 | 66 | 79.26 | 2.97 | - | - |

**Supplementary Table 2** Primer sequences for the genes of CNTNAP2, GUCD1 and PITHD1

| **Primer** | **Sequence** |
| --- | --- |
| CNTNAP2 F | TGAACACCCCAGATGGAAGC |
| CNTNAP2 R | CCAGAGCCTCCCCAGTAGTA |
| GUCD1 F | GAGAAGGAACTCGACACGCA |
| GUCD1 R | CAGGCAGTTGCACAAAGTCC |
| PITHD1 F | GGCTGCAATGCCTTAACGAG |
| PITHD1 R | ACAGAAGCTCTTCATCTGCATCA |
| GAPDH F | CGAAGGTGGAGTCAACGGATTT |
| GAPDH R | ATGGGTGGAATCATATTGGAAC |

**Supplementary Table 3** IVs for MR analysis.

| SNP | Effect allele | Other allele | chr | pos | id.exposure | pval |
| --- | --- | --- | --- | --- | --- | --- |
| rs10782001 | A | G | 16 | 30942625 | eqtl-a-ENSG00000138867 | 7.17E-10 |
| rs113892861 | T | G | 22 | 24820094 | eqtl-a-ENSG00000138867 | 4.01E-14 |
| rs115039171 | C | A | 22 | 24662694 | eqtl-a-ENSG00000138867 | 5.39E-07 |
| rs115202559 | C | G | 22 | 24757238 | eqtl-a-ENSG00000138867 | 5.72E-07 |
| rs115786334 | C | T | 22 | 24772404 | eqtl-a-ENSG00000138867 | 1.63E-06 |
| rs11653357 | A | G | 17 | 33923607 | eqtl-a-ENSG00000138867 | 4.34E-10 |
| rs11704811 | T | C | 22 | 24833164 | eqtl-a-ENSG00000138867 | 9.91E-12 |
| rs11704936 | A | G | 22 | 24916182 | eqtl-a-ENSG00000138867 | 7.00E-08 |
| rs12212092 | T | C | 6 | 30128442 | eqtl-a-ENSG00000138867 | 1.70E-05 |
| rs12445568 | C | T | 16 | 31004812 | eqtl-a-ENSG00000138867 | 1.77E-11 |
| rs12485738 | G | A | 3 | 56865776 | eqtl-a-ENSG00000138867 | 1.35E-06 |
| rs1331308 | C | A | 6 | 135405122 | eqtl-a-ENSG00000138867 | 9.39E-07 |
| rs1354034 | C | T | 3 | 56849749 | eqtl-a-ENSG00000138867 | 1.16E-08 |
| rs138019862 | T | G | 22 | 24821154 | eqtl-a-ENSG00000138867 | 9.56E-14 |
| rs139152401 | T | C | 22 | 24782857 | eqtl-a-ENSG00000138867 | 3.90E-07 |
| rs141132403 | C | T | 22 | 24705582 | eqtl-a-ENSG00000138867 | 4.46E-07 |
| rs145442727 | T | C | 22 | 24854950 | eqtl-a-ENSG00000138867 | 1.15E-07 |
| rs150254283 | A | T | 22 | 24684715 | eqtl-a-ENSG00000138867 | 9.74E-07 |
| rs17004912 | A | T | 22 | 24793793 | eqtl-a-ENSG00000138867 | 5.15E-07 |
| rs17004919 | G | A | 22 | 24832547 | eqtl-a-ENSG00000138867 | 2.91E-06 |
| rs17076724 | T | G | 5 | 173363667 | eqtl-a-ENSG00000138867 | 7.98E-08 |
| rs225245 | G | A | 17 | 33946107 | eqtl-a-ENSG00000138867 | 4.32E-38 |
| rs35033748 | C | T | 17 | 27179590 | eqtl-a-ENSG00000138867 | 3.84E-09 |
| rs3811444 | T | C | 1 | 248039451 | eqtl-a-ENSG00000138867 | 1.25E-05 |
| rs41311137 | A | G | 22 | 24573435 | eqtl-a-ENSG00000138867 | 4.29E-07 |
| rs4669306 | A | G | 2 | 8754206 | eqtl-a-ENSG00000138867 | 6.47E-08 |
| rs4820598 | A | C | 22 | 24976110 | eqtl-a-ENSG00000138867 | 2.18E-19 |
| rs5996708 | T | C | 22 | 24887500 | eqtl-a-ENSG00000138867 | 1.52E-05 |
| rs62231974 | T | C | 22 | 24491209 | eqtl-a-ENSG00000138867 | 1.80E-06 |
| rs62234054 | T | A | 22 | 24865248 | eqtl-a-ENSG00000138867 | 1.46E-05 |
| rs6569992 | A | G | 6 | 135452152 | eqtl-a-ENSG00000138867 | 6.51E-17 |
| rs6592965 | A | G | 7 | 50427982 | eqtl-a-ENSG00000138867 | 5.41E-38 |
| rs6904897 | G | T | 6 | 135382980 | eqtl-a-ENSG00000138867 | 7.89E-09 |
| rs7213285 | A | G | 17 | 27206029 | eqtl-a-ENSG00000138867 | 5.70E-07 |
| rs7289915 | A | C | 22 | 24963560 | eqtl-a-ENSG00000138867 | 2.33E-23 |
| rs7290144 | C | G | 22 | 24949953 | eqtl-a-ENSG00000138867 | 4.51E-52 |
| rs762279 | A | G | 22 | 24897743 | eqtl-a-ENSG00000138867 | 1.21E-05 |
| rs76742196 | T | C | 22 | 24715798 | eqtl-a-ENSG00000138867 | 2.39E-06 |
| rs76800621 | C | G | 22 | 24740260 | eqtl-a-ENSG00000138867 | 7.69E-07 |
| rs77895031 | C | T | 22 | 24908764 | eqtl-a-ENSG00000138867 | 1.85E-20 |
| rs78088707 | A | G | 22 | 24877307 | eqtl-a-ENSG00000138867 | 2.19E-07 |
| rs78625928 | T | C | 22 | 24842684 | eqtl-a-ENSG00000138867 | 1.20E-07 |
| rs79421602 | C | T | 22 | 24805108 | eqtl-a-ENSG00000138867 | 9.54E-07 |
| rs8073060 | A | T | 17 | 33875262 | eqtl-a-ENSG00000138867 | 2.66E-42 |
| rs8082605 | T | G | 17 | 33864771 | eqtl-a-ENSG00000138867 | 2.66E-13 |
| rs8139822 | G | A | 22 | 24938908 | eqtl-a-ENSG00000138867 | 3.90E-53 |
| rs8140263 | T | C | 22 | 24727761 | eqtl-a-ENSG00000138867 | 2.48E-06 |
| rs875741 | A | G | 5 | 173287851 | eqtl-a-ENSG00000138867 | 1.51E-09 |
| rs9399137 | C | T | 6 | 135419018 | eqtl-a-ENSG00000138867 | 5.11E-28 |
| rs9494145 | C | T | 6 | 135435501 | eqtl-a-ENSG00000138867 | 1.92E-21 |
| rs9608282 | T | G | 22 | 24804081 | eqtl-a-ENSG00000138867 | 5.51E-07 |
| rs9624493 | A | G | 22 | 24927079 | eqtl-a-ENSG00000138867 | 1.84E-50 |
| rs9908158 | C | T | 17 | 33890083 | eqtl-a-ENSG00000138867 | 4.02E-23 |
| rs9915021 | T | C | 17 | 33976619 | eqtl-a-ENSG00000138867 | 1.78E-10 |
| rs10821556 | A | C | 9 | 136942136 | eqtl-a-ENSG00000057757 | 4.58E-05 |
| rs10917420 | T | C | 1 | 24062987 | eqtl-a-ENSG00000057757 | 1.30E-07 |
| rs114381163 | A | G | 1 | 23934044 | eqtl-a-ENSG00000057757 | 2.61E-07 |
| rs11582839 | A | G | 1 | 23975918 | eqtl-a-ENSG00000057757 | 1.79E-06 |
| rs11653357 | A | G | 17 | 33923607 | eqtl-a-ENSG00000057757 | 5.29E-08 |
| rs1172130 | A | G | 1 | 205244953 | eqtl-a-ENSG00000057757 | 2.00E-05 |
| rs11789898 | T | G | 9 | 136925663 | eqtl-a-ENSG00000057757 | 5.88E-06 |
| rs12080928 | T | G | 1 | 23985488 | eqtl-a-ENSG00000057757 | 1.27E-08 |
| rs12365482 | T | A | 11 | 16612936 | eqtl-a-ENSG00000057757 | 3.52E-07 |
| rs12974711 | C | T | 19 | 11297289 | eqtl-a-ENSG00000057757 | 2.75E-05 |
| rs1354034 | C | T | 3 | 56849749 | eqtl-a-ENSG00000057757 | 1.35E-05 |
| rs141208850 | A | G | 1 | 23949742 | eqtl-a-ENSG00000057757 | 2.65E-07 |
| rs17076724 | T | G | 5 | 173363667 | eqtl-a-ENSG00000057757 | 1.19E-08 |
| rs17695092 | G | T | 5 | 173337853 | eqtl-a-ENSG00000057757 | 2.70E-05 |
| rs2022065 | T | C | 6 | 30121460 | eqtl-a-ENSG00000057757 | 1.25E-05 |
| rs2179395 | C | T | 1 | 24148365 | eqtl-a-ENSG00000057757 | 1.41E-05 |
| rs2235541 | T | C | 1 | 24077451 | eqtl-a-ENSG00000057757 | 1.55E-09 |
| rs225245 | G | A | 17 | 33946107 | eqtl-a-ENSG00000057757 | 3.84E-12 |
| rs2473375 | T | C | 1 | 24136545 | eqtl-a-ENSG00000057757 | 4.86E-05 |
| rs2501367 | A | C | 1 | 24205274 | eqtl-a-ENSG00000057757 | 2.36E-05 |
| rs2864094 | G | A | 1 | 23996249 | eqtl-a-ENSG00000057757 | 1.90E-07 |
| rs3811444 | T | C | 1 | 248039451 | eqtl-a-ENSG00000057757 | 1.68E-18 |
| rs4237 | A | G | 1 | 24114129 | eqtl-a-ENSG00000057757 | 1.04E-05 |
| rs56163845 | G | A | 5 | 173373948 | eqtl-a-ENSG00000057757 | 3.49E-05 |
| rs592423 | C | A | 6 | 139840693 | eqtl-a-ENSG00000057757 | 3.59E-25 |
| rs59817566 | A | G | 1 | 23913881 | eqtl-a-ENSG00000057757 | 1.57E-06 |
| rs605066 | T | C | 6 | 139829666 | eqtl-a-ENSG00000057757 | 7.40E-20 |
| rs61773533 | C | A | 1 | 24381683 | eqtl-a-ENSG00000057757 | 1.30E-05 |
| rs61777316 | A | G | 1 | 23974787 | eqtl-a-ENSG00000057757 | 5.80E-09 |
| rs6592965 | A | G | 7 | 50427982 | eqtl-a-ENSG00000057757 | 1.76E-18 |
| rs7515969 | A | G | 1 | 24158398 | eqtl-a-ENSG00000057757 | 3.28E-05 |
| rs766432 | A | C | 2 | 60719970 | eqtl-a-ENSG00000057757 | 2.89E-06 |
| rs7705502 | A | G | 5 | 173320815 | eqtl-a-ENSG00000057757 | 3.09E-05 |
| rs8013143 | G | A | 14 | 23494277 | eqtl-a-ENSG00000057757 | 3.31E-06 |
| rs8067342 | T | C | 17 | 21156860 | eqtl-a-ENSG00000057757 | 2.27E-07 |
| rs8073060 | A | T | 17 | 33875262 | eqtl-a-ENSG00000057757 | 6.15E-11 |
| rs8082605 | T | G | 17 | 33864771 | eqtl-a-ENSG00000057757 | 2.84E-05 |
| rs875741 | A | G | 5 | 173287851 | eqtl-a-ENSG00000057757 | 4.49E-07 |
| rs9908158 | C | T | 17 | 33890083 | eqtl-a-ENSG00000057757 | 2.00E-07 |
| rs9915021 | T | C | 17 | 33976619 | eqtl-a-ENSG00000057757 | 1.37E-07 |

**Supplementary Table 4** Heterogeneity test of biomarkers with COPD.

| outcome | exposure | method | Q | Q_df | Q_pval |
| --- | --- | --- | --- | --- | --- |
| COPD | || id:eqtl-a-ENSG00000057757 | MR Egger | 37.558 | 38 | 0.490 |
| COPD | || id:eqtl-a-ENSG00000057757 | Inverse variance weighted | 37.717 | 39 | 0.528 |
| COPD | || id:eqtl-a-ENSG00000138867 | MR Egger | 33.975 | 52 | 0.975 |
| COPD | || id:eqtl-a-ENSG00000138867 | Inverse variance weighted | 34.414 | 53 | 0.978 |

**Supplementary Table 5** Horizontal pleiotropy test of biomarkers with COPD.

| outcome | exposure | egger_intercept | se | pval |
| --- | --- | --- | --- | --- |
| COPD | || id:eqtl-a-ENSG00000057757 | 0.019959961 | 0.050058843 | 0.692324 |
| COPD | || id:eqtl-a-ENSG00000138867 | 0.03 | 0.045 | 0.511 |
